# Supplementary material for: Food Beliefs and the Risk of Orthorexia in Patients with Inflammatory Bowel Disease
Source: MDPI journal article supplement (doi:10.3390/nu16081193), 2024-04-17
Supplement: s1 [file s1]

**Supplementary table n.1**

|                  | <b>Patients with risk of orthorexia</b><br><b>N=87</b> |              |                  |              |
|------------------|--------------------------------------------------------|--------------|------------------|--------------|
| <b>Questions</b> | <b>Always</b>                                          | <b>Often</b> | <b>Sometimes</b> | <b>Never</b> |
| <b>1</b>         | 5 (5.7%)                                               | 10 (11.5%)   | 14 (16.1%)       | 58 (66.7%)   |
| <b>2</b>         | 0                                                      | 5 (5.7%)     | 6 (6.9%)         | 76 (87.4%)   |
| <b>3</b>         | 7 (8%)                                                 | 12 (13.8%)   | 17 (19.5%)       | 51 (58.6%)   |
| <b>4</b>         | 14 (16.1%)                                             | 23 (26.4%)   | 36 (41.4%)       | 14 (16.1%)   |
| <b>5</b>         | 17 (19.5%)                                             | 3 (3.4%)     | 24 (27.6%)       | 43 (49.4%)   |
| <b>6</b>         | 50 (57.5%)                                             | 9 (10.3%)    | 23 (26.4%)       | 5 (5.7%)     |
| <b>7</b>         | 2 (2.3%)                                               | 16 (18.4%)   | 7 (8%)           | 62 (71.3%)   |
| <b>8</b>         | 6 (6.9%)                                               | 34 (39%)     | 36 (41.4%)       | 11 (12.6%)   |
| <b>9</b>         | 11 (12.6%)                                             | 17 (19.5%)   | 24 (27.6%)       | 35 (40.2%)   |
| <b>10</b>        | 22 (25.3%)                                             | 16 (18.4%)   | 30 (34.4%)       | 19 (21.8%)   |
| <b>11</b>        | 20 (23%)                                               | 22 (25.3%)   | 18 (20.7%)       | 27 (31%)     |
| <b>12</b>        | 36 (41.4%)                                             | 22 (25.3%)   | 18 (20.7%)       | 11 (12.6%)   |
| <b>13</b>        | 9 (10.3%)                                              | 6 (6.9%)     | 13 (14.9%)       | 59 (67.8%)   |
| <b>14</b>        | 45 (51.7%)                                             | 33 (37.9%)   | 5 (5.7%)         | 4 (4.6%)     |
| <b>15</b>        | 0                                                      | 5 (5.7%)     | 16 (18.4%)       | 66 (75.9%)   |

**Supplementary table n.2**

|                  | <b>Patients without risk of orthorexia</b><br><b>N=26</b> |              |                  |              |
|------------------|-----------------------------------------------------------|--------------|------------------|--------------|
| <b>Questions</b> | <b>Always</b>                                             | <b>Often</b> | <b>Sometimes</b> | <b>Never</b> |
| <b>1</b>         | 1 (3.8%)                                                  | 1 (3.8%)     | 5 (19.2%)        | 19 (73.1%)   |
| <b>2</b>         | 0                                                         | 0            | 1 (3.8%)         | 25 (96.2%)   |
| <b>3</b>         | 0                                                         | 0            | 6 (23%)          | 20 (77%)     |
| <b>4</b>         | 2 (7.7%)                                                  | 1 (3.8%)     | 14 (53.8%)       | 9 (34.6%)    |
| <b>5</b>         | 9 (34.6%)                                                 | 5 (19.2%)    | 3 (11.5%)        | 9 (34.6%)    |
| <b>6</b>         | 6 (23%)                                                   | 3 (11.5%)    | 7 (26.9%)        | 10 (38.5%)   |
| <b>7</b>         | 0                                                         | 1 (3.8%)     | 3 (11.5%)        | 22 (84.6%)   |
| <b>8</b>         | 4 (15.4%)                                                 | 12 (46.2%)   | 8 (30.8%)        | 2 (7.6%)     |
| <b>9</b>         | 2 (7.7%)                                                  | 5 (19.2%)    | 5 (19.2%)        | 14 (53.8%)   |
| <b>10</b>        | 3 (11.5%)                                                 | 1 (3.8%)     | 4 (15.4%)        | 18 (69.2%)   |
| <b>11</b>        | 2 (7.7%)                                                  | 4 (15.4%)    | 11 (42.3%)       | 9 (34.6%)    |
| <b>12</b>        | 0                                                         | 8 (30.8%)    | 4 (15.4%)        | 14 (53.8%)   |
| <b>13</b>        | 2 (7.7%)                                                  | 3 (11.5%)    | 9 (34.6%)        | 12 (46.2%)   |
| <b>14</b>        | 8 (30.8%)                                                 | 8 (30.8%)    | 6 (23%)          | 4 (15.4%)    |
| <b>15</b>        | 1 (3.8%)                                                  | 0            | 1 (3.8%)         | 24 (92.3%)   |

**Supplementary table n.3**

|           | Control group with risk of orthorexia<br>N=21 |            |            |            |
|-----------|-----------------------------------------------|------------|------------|------------|
| Questions | Always                                        | Often      | Sometimes  | Never      |
| 1         | 4 (19%)                                       | 5 (23.8%)  | 7 (33.3%)  | 5 (23.8%)  |
| 2         | 0                                             | 1 (4.8%)   | 3 (14.2%)  | 17 (81%)   |
| 3         | 0                                             | 5 (23.8%)  | 6 (28.6%)  | 10 (47.6%) |
| 4         | 1 (4.8%)                                      | 7 (33.3%)  | 9 (42.9%)  | 4 (19%)    |
| 5         | 1 (4.8%)                                      | 2 (9.5%)   | 8 (38%)    | 10 (47.6%) |
| 6         | 9 (42.9%)                                     | 10 (47.6%) | 2 (9.5%)   | 0          |
| 7         | 1 (4.8%)                                      | 0          | 3 (14.2%)  | 17 (81%)   |
| 8         | 1 (4.8%)                                      | 7 (33.3%)  | 12 (57%)   | 1 (4.8%)   |
| 9         | 4 (19%)                                       | 3 (14.2%)  | 8 (38%)    | 6 (28.6%)  |
| 10        | 3 (14.2%)                                     | 4 (19%)    | 6 (28.6%)  | 8 (38%)    |
| 11        | 4 (19%)                                       | 6 (28.6%)  | 6 (28.6%)  | 5 (23.8%)  |
| 12        | 8 (38%)                                       | 8 (38%)    | 3 (14.2%)  | 2 (9.5%)   |
| 13        | 2 (9.5%)                                      | 3 (14.2%)  | 11 (52.4%) | 5 (23.8%)  |
| 14        | 10 (47.6%)                                    | 11 (52.4%) | 0          | 0          |
| 15        | 0                                             | 6 (28.6%)  | 12 (57%)   | 3 (14.2%)  |

**Supplementary table n.4**

|           | Control group without risk of orthorexia<br>N=24 |            |            |            |
|-----------|--------------------------------------------------|------------|------------|------------|
| Questions | Always                                           | Often      | Sometimes  | Never      |
| 1         | 2 (8.3%)                                         | 3 (12.5%)  | 10 (41.7%) | 9 (37.5%)  |
| 2         | 0                                                | 0          | 2 (8.3%)   | 22 (91.7%) |
| 3         | 0                                                | 0          | 4 (16.7%)  | 20 (83.3%) |
| 4         | 0                                                | 1 (4.17%)  | 5 (20.8%)  | 18 (75%)   |
| 5         | 8 (33.3%)                                        | 6 (25%)    | 8 (33.3%)  | 2 (8.3%)   |
| 6         | 5 (20.8%)                                        | 7 (29.2%)  | 9 (37.5%)  | 3 (12.5%)  |
| 7         | 0                                                | 0          | 1 (4.17%)  | 23 (95.8%) |
| 8         | 8 (33.3%)                                        | 10 (41.7%) | 6 (25%)    | 0          |
| 9         | 7 (29.2%)                                        | 5 (20.8%)  | 7 (29.2%)  | 5 (20.8%)  |
| 10        | 0                                                | 3 (12.5%)  | 7 (29.2%)  | 14 (58.3%) |
| 11        | 1 (4.17%)                                        | 1 (4.17%)  | 5 (20.8%)  | 17 (70.8%) |
| 12        | 5 (20.8%)                                        | 7 (29.2%)  | 6 (25%)    | 6 (25%)    |
| 13        | 2 (8.3%)                                         | 2 (8.3%)   | 9 (37.5%)  | 11 (45.8%) |
| 14        | 9 (37.5%)                                        | 11 (45.8%) | 4 (16.7%)  | 0          |
| 15        | 0                                                | 2 (8.3%)   | 15 (62.5%) | 7 (29.2%)  |
